# Supplementary material for: Contribution of Risk and Resilience Factors to Suicidality among Mental Health-Help-Seeking Adolescent Outpatients: A Cross-Sectional Study
Source: MDPI journal article supplement (doi:10.3390/jcm12051974), 2023-03-02
Supplement: s1 [file s1]

# Resilience Counters but Does Not Mitigate the Association Between Peer-Victimization and Suicidality: A Cross-Sectional Study Among Adolescents Referring to an Outpatient Psychiatric Clinic

## Supplementary material

**Table S1.** Multivariate logistic regression model with ASQ  $\geq 1$  as dependent variable; co-varying for depressive and anxiety symptoms.

| Factor                                                     | OR (95% CI)       | p           |
|------------------------------------------------------------|-------------------|-------------|
| Age <sup>a</sup>                                           | 1.52 (0.96, 2.68) | .16         |
| Sex <sup>b</sup>                                           | 1.51 (0.46, 5.13) | .50         |
| Negative life events <sup>a</sup>                          | 0.90 (0.46, 1.68) | .76         |
| Parents' income <sup>a</sup>                               | 1.12 (0.63, 2.03) | .69         |
| Parents layoff during COVID-19 <sup>b</sup>                | 0.60 (0.12, 2.45) | .49         |
| Peer victimization <sup>a</sup>                            | 3.67 (1.76, 8.72) | <b>.001</b> |
| Resilience factors score <sup>a</sup>                      | 0.37 (0.14, 0.89) | <b>.033</b> |
| Resilience factors score * Peer victimization <sup>a</sup> | 1.48 (0.87, 2.64) | .16         |

PHQ-8 (i.e., PHQ-9 scores excluding suicidal ideation item) and GAD-7 scores were introduced as covariates to the model

<sup>a</sup> Standardized-scores

<sup>b</sup> Binary-values
